# Supplementary material for: S-Allylmercaptocysteine induces G2/M phase arrest and apoptosis via ROS-mediated p38 and JNK signaling pathway in human colon cancer cells in vitro and in vivo
Source: Royal Society of Chemistry journal article supplement (doi:10.1039/c7ra10346h), 2017-01-01
Supplement: c7ra10346h1.pdf [file c7ra10346h1.pdf]

The typical pictures are as follows:

**Fig1A**

1.

| SAMC( $\mu$ M) | OD value |        |        |        |        | cell viability(%) |
|----------------|----------|--------|--------|--------|--------|-------------------|
| 0              | 0.9891   | 0.9432 | 0.9623 | 0.9987 | 1.1038 | 100               |
| 50             | 0.9269   | 0.8726 | 0.9141 | 0.8781 | 0.8979 | 90.7              |
| 100            | 0.8765   | 0.8684 | 0.8725 | 0.8974 | 0.8476 | 88.13             |
| 200            | 0.4744   | 0.4599 | 0.4821 | 0.4472 | 0.4672 | 47.19             |
| 400            | 0.3924   | 0.3721 | 0.4127 | 0.3872 | 0.3998 | 39.64             |
| 600            | 0.3653   | 0.3717 | 0.3789 | 0.3812 | 0.3698 | 37.55             |

2.

| SAMC( $\mu$ M) | OD value |        |        |        |        | cell viability(%) |
|----------------|----------|--------|--------|--------|--------|-------------------|
| 0              | 1.2638   | 1.2756 | 1.2398 | 1.2487 | 1.2531 | 100               |
| 50             | 1.0755   | 1.0479 | 1.0727 | 1.1783 | 1.0598 | 86.95             |
| 100            | 1.0339   | 1.0238 | 1.0272 | 1.0445 | 1.0915 | 82.18             |
| 200            | 0.661    | 0.6579 | 0.5942 | 0.6594 | 0.6431 | 51.45             |
| 400            | 0.4589   | 0.4673 | 0.4897 | 0.4923 | 0.471  | 37.68             |
| 600            | 0.4685   | 0.4598 | 0.4421 | 0.4997 | 0.4562 | 36.5              |

3.

| SAMC( $\mu$ M) | OD value |        |        |        |        | cell viability(%) |
|----------------|----------|--------|--------|--------|--------|-------------------|
| 0              | 1.128    | 1.1015 | 1.1232 | 1.1785 | 1.1099 | 100               |
| 50             | 1.0017   | 0.9931 | 1.0289 | 0.9782 | 0.9605 | 88.83             |
| 100            | 0.9555   | 0.9491 | 0.9707 | 0.9694 | 0.9463 | 85.18             |
| 200            | 0.5679   | 0.5386 | 0.5538 | 0.5543 | 0.5589 | 49.32             |
| 400            | 0.4259   | 0.4512 | 0.4387 | 0.4359 | 0.4208 | 38.66             |
| 600            | 0.4175   | 0.4098 | 0.4412 | 0.4126 | 0.4148 | 37.04             |

**Fig1B**

1.

|          | OD value |        |        |        |        | cell viability(%) |
|----------|----------|--------|--------|--------|--------|-------------------|
| control  | 0.8912   | 0.9108 | 0.8672 | 0.8798 | 0.8812 | 100               |
| NAC      | 0.6723   | 0.6678 | 0.6402 | 0.6329 | 0.6543 | 74.35             |
| SAMC     | 0.3672   | 0.3701 | 0.3812 | 0.3799 | 0.3752 | 42.64             |
| NAC+SAMC | 0.6823   | 0.6612 | 0.6533 | 0.6498 | 0.6693 | 76.06             |

2.

|          | OD value |        |        |        |        | cell viability(%) |
|----------|----------|--------|--------|--------|--------|-------------------|
| control  | 1.1367   | 1.0527 | 1.1097 | 1.2295 | 1.2531 | 100               |
| NAC      | 0.8733   | 0.8912 | 0.8439 | 0.8592 | 0.8667 | 78.79             |
| SAMC     | 0.4167   | 0.4212 | 0.4304 | 0.4228 | 0.4288 | 37.09             |
| NAC+SAMC | 0.9157   | 0.9387 | 0.9202 | 0.9314 | 0.9247 | 79.99             |

### 3.

|          | OD value |        |        |        |        | cell viability(%) |
|----------|----------|--------|--------|--------|--------|-------------------|
| control  | 0.9887   | 1.0532 | 0.9875 | 1.0673 | 1.0141 | 100               |
| NAC      | 0.7428   | 0.7465 | 0.7795 | 0.7615 | 0.7718 | 76.58             |
| SAMC     | 0.4062   | 0.4021 | 0.3953 | 0.4029 | 0.3928 | 39.82             |
| NAC+SAMC | 0.7869   | 0.7916 | 0.7982 | 0.7973 | 0.7987 | 78.04             |

**Fig1C**

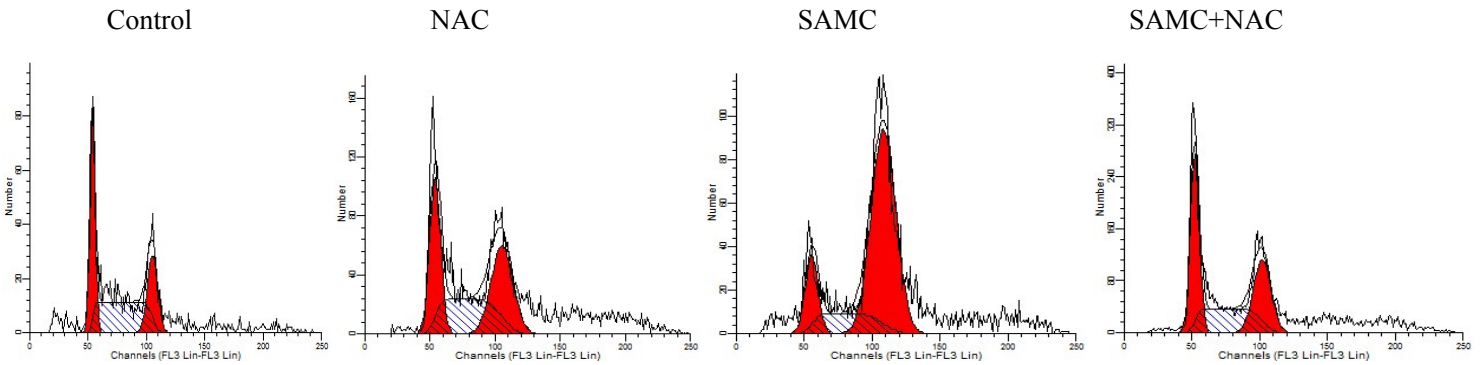

**Fig1D**

|          | G2 phase |      |        |
|----------|----------|------|--------|
| control  | 22.87    | 24.7 | 23.785 |
| NAC      | 34.61    | 29.7 | 32.155 |
| SAMC     | 70.13    | 65.4 | 67.765 |
| NAC+SAMC | 30.72    | 35.8 | 33.26  |

**Fig1E**

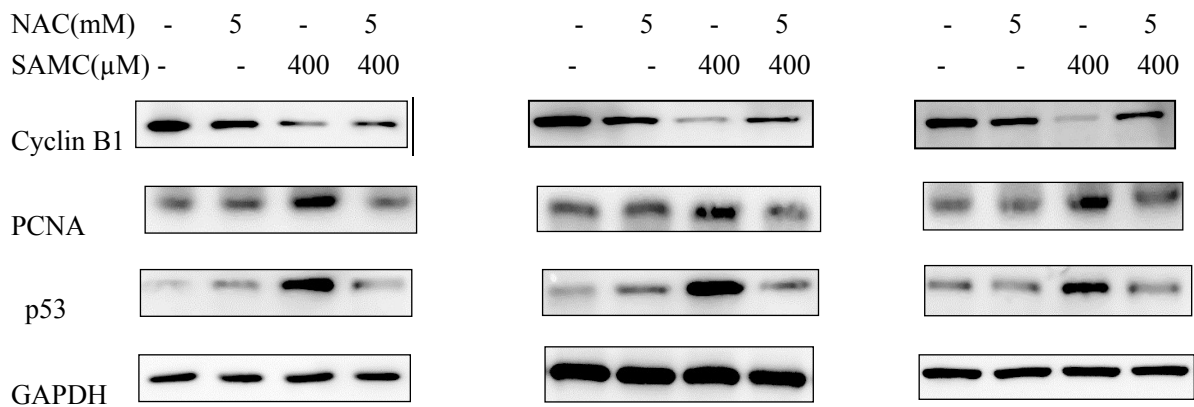

**Fig2A**

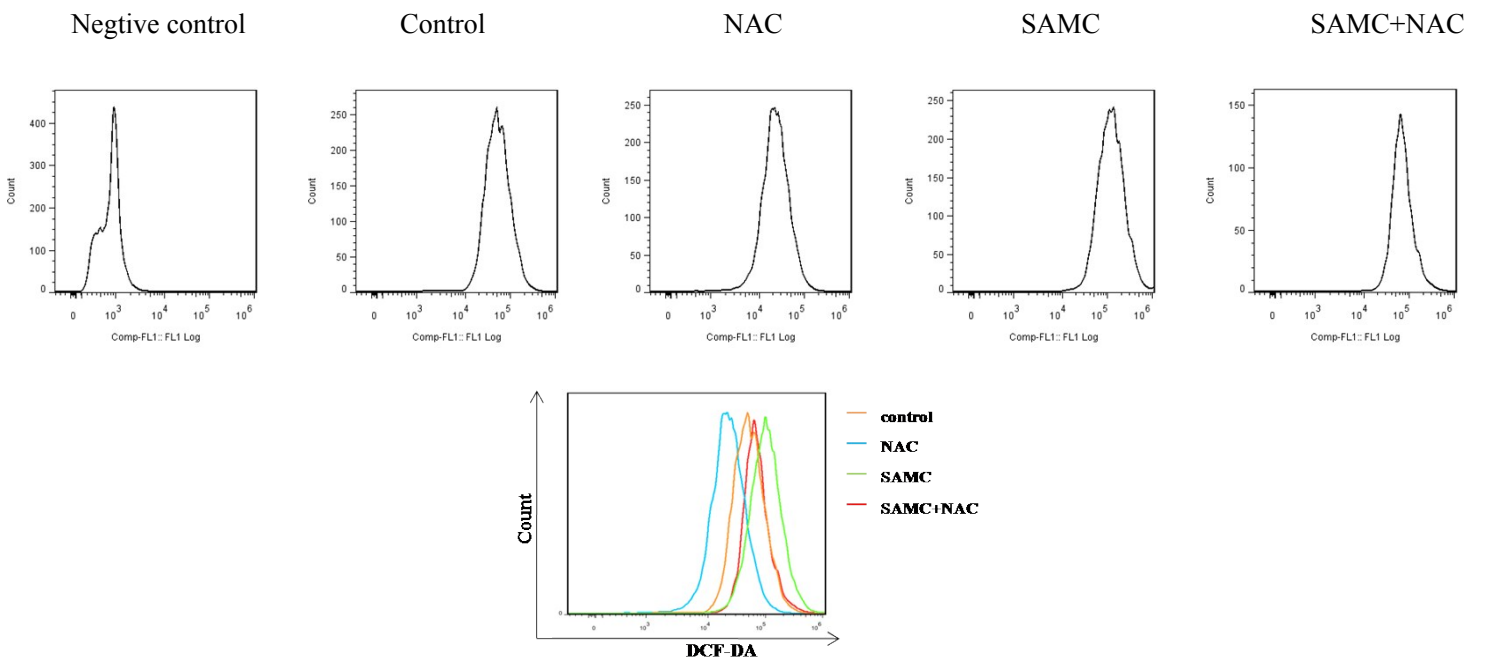

|          | Mean fluorescence intensity |     |      |
|----------|-----------------------------|-----|------|
| control  | 54                          | 59  | 56.5 |
| NAC      | 25.4                        | 21  | 23.2 |
| SAMC     | 109                         | 115 | 112  |
| NAC+SAMC | 71.2                        | 65  | 68.1 |

**Fig2B**

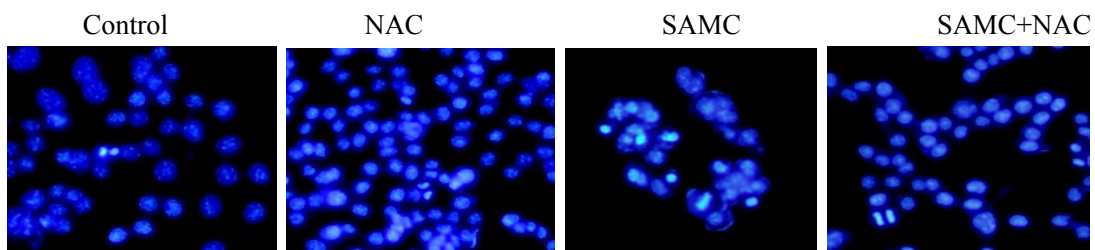

**Fig2C**

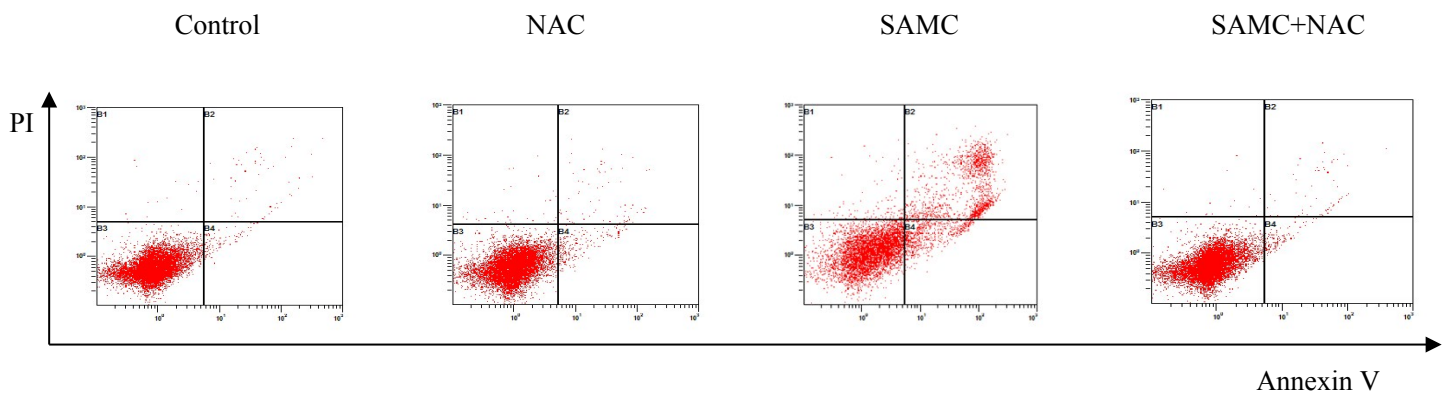

|          | % of apoptotic cells |       |       |
|----------|----------------------|-------|-------|
| control  | 4.57                 | 3.35  | 5.79  |
| NAC      | 5.885                | 5.48  | 6.29  |
| SAMC     | 30.02                | 31.39 | 28.65 |
| NAC+SAMC | 4.88                 | 3.89  | 5.87  |

**Fig3A**

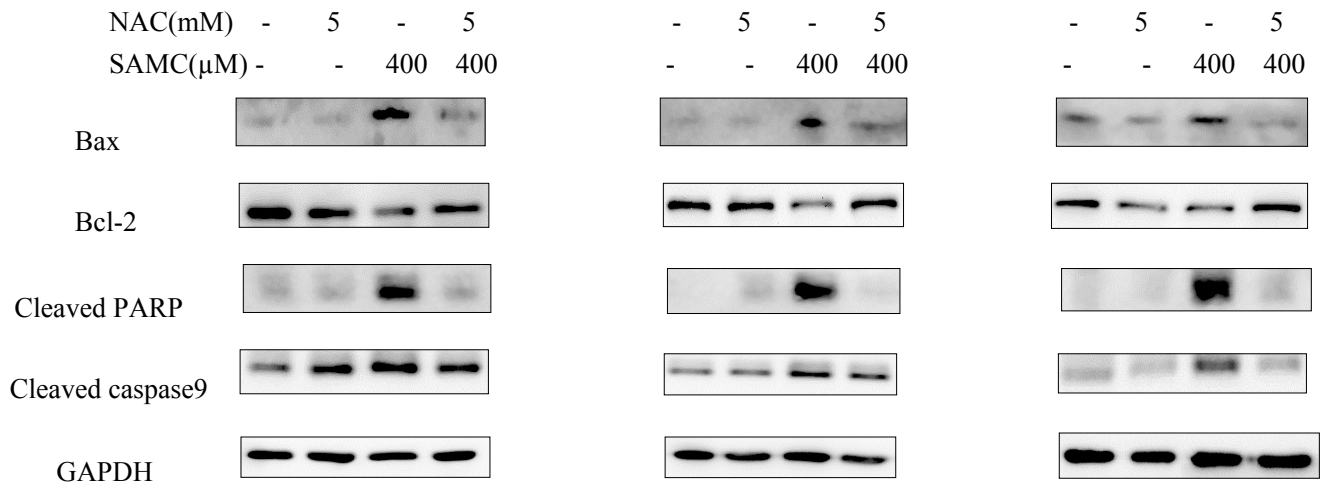

**Fig3B**

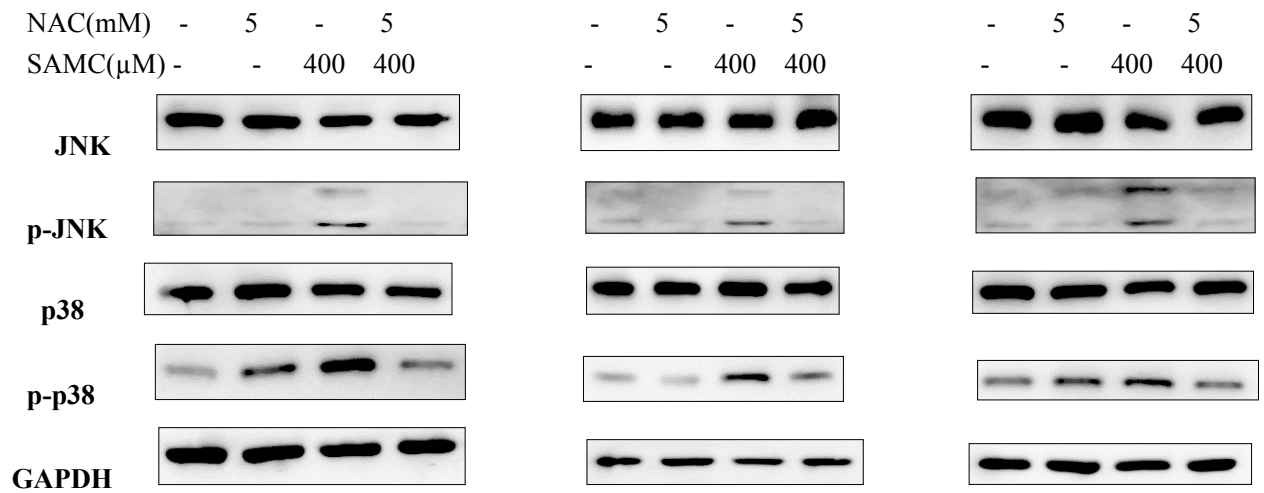

**Fig4A**

| day | control |         |         |        |        |        |
|-----|---------|---------|---------|--------|--------|--------|
| 0   | 149.46  | 136.07  | 135.15  | 131.55 | 97.60  | 99.45  |
| 4   | 271.09  | 219.28  | 216.15  | 251.49 | 198.80 | 211.17 |
| 8   | 375.15  | 257.62  | 309.07  | 339.72 | 264.27 | 265.24 |
| 12  | 449.80  | 458.75  | 360.70  | 382.06 | 310.35 | 349.26 |
| 16  | 455.44  | 568.76  | 519.89  | 420.92 | 414.61 | 536.32 |
| 20  | 658.73  | 809.86  | 783.11  | 563.52 | 524.25 | 759.60 |
| 24  | 943.09  | 1121.09 | 1179.24 | 756.35 | 733.85 | 842.47 |
| 28  | 1214.47 | 1402.99 | 1358.23 | 918.18 | 868.10 | 916.35 |

| day | SAMC 40 mg/kg |        |        |        |        |        |
|-----|---------------|--------|--------|--------|--------|--------|
| 0   | 102.28        | 125.49 | 111.89 | 101.35 | 102.56 | 141.80 |
| 4   | 148.13        | 159.12 | 130.72 | 121.92 | 108.95 | 250.62 |
| 8   | 158.78        | 263.78 | 185.23 | 128.91 | 132.10 | 341.30 |
| 12  | 186.05        | 347.85 | 213.09 | 136.15 | 177.27 | 376.88 |
| 16  | 247.65        | 398.32 | 343.54 | 184.61 | 215.13 | 415.59 |
| 20  | 317.61        | 462.46 | 390.31 | 238.07 | 250.69 | 503.86 |
| 24  | 344.06        | 495.82 | 454.41 | 295.90 | 294.18 | 639.00 |
| 28  | 434.04        | 547.75 | 577.75 | 427.92 | 398.26 | 909.05 |

| day | SAMC 60 mg/kg |        |        |        |        |        |
|-----|---------------|--------|--------|--------|--------|--------|
| 0   | 158.99        | 108.36 | 118.27 | 144.47 | 101.64 | 143.43 |
| 4   | 219.30        | 158.06 | 149.15 | 169.87 | 120.43 | 158.34 |
| 8   | 270.99        | 226.60 | 175.03 | 196.33 | 152.14 | 234.44 |
| 12  | 307.85        | 251.99 | 201.50 | 206.09 | 182.06 | 255.74 |
| 16  | 362.99        | 291.34 | 284.60 | 252.36 | 226.16 | 377.82 |
| 20  | 422.06        | 394.26 | 299.56 | 298.47 | 273.14 | 411.48 |
| 24  | 483.96        | 442.64 | 318.16 | 358.35 | 278.43 | 439.40 |
| 28  | 695.38        | 681.69 | 420.87 | 438.32 | 359.42 | 463.05 |

| day | SAMC 80 mg/kg |        |        |        |        |        |
|-----|---------------|--------|--------|--------|--------|--------|
| 0   | 181.26        | 143.07 | 157.36 | 116.56 | 136.73 | 97.68  |
| 4   | 201.56        | 190.94 | 161.60 | 135.97 | 150.06 | 147.61 |
| 8   | 270.36        | 244.56 | 165.57 | 190.91 | 184.35 | 181.80 |
| 12  | 304.22        | 260.96 | 190.84 | 213.50 | 195.61 | 195.38 |
| 16  | 347.98        | 314.99 | 239.96 | 230.95 | 229.00 | 217.62 |
| 20  | 421.54        | 359.64 | 264.64 | 291.97 | 270.97 | 295.11 |
| 24  | 438.02        | 381.44 | 356.91 | 324.03 | 326.13 | 363.33 |
| 28  | 568.27        | 490.69 | 428.97 | 454.30 | 354.56 | 506.79 |

| day | DDP    |        |        |        |        |        |
|-----|--------|--------|--------|--------|--------|--------|
| 0   | 101.45 | 130.14 | 116.53 | 135.21 | 139.24 | 132.85 |
| 4   | 157.23 | 175.30 | 146.01 | 224.12 | 226.24 | 194.15 |
| 8   | 210.99 | 211.39 | 196.44 | 252.56 | 234.86 | 282.01 |
| 12  | 214.91 | 210.90 | 220.92 | 303.02 | 236.18 | 294.11 |
| 16  | 260.05 | 240.80 | 247.27 | 322.92 | 238.37 | 311.65 |
| 20  | 269.96 | 273.54 | 274.50 | 348.65 | 286.73 | 336.69 |
| 24  | 282.46 | 286.19 | 314.41 | 353.43 | 366.98 | 353.48 |
| 28  | 315.06 | 356.98 | 348.57 | 376.87 | 394.70 | 364.43 |

**Fig4B**

| Average animal weight |         |               |               |               |       |
|-----------------------|---------|---------------|---------------|---------------|-------|
| day                   | control | SAMC 40 mg/kg | SAMC 60 mg/kg | SAMC 80 mg/kg | DDP   |
| 0                     | 16.57   | 17.355        | 16.275        | 16.74         | 17.62 |
| 4                     | 15.4    | 16.45         | 15.225        | 15.79         | 16.47 |
| 8                     | 14.665  | 15.33         | 14.525        | 15.37         | 14.42 |
| 12                    | 14.2    | 15.1          | 14.78         | 15.29         | 13.34 |
| 16                    | 15.04   | 15.63         | 15.3          | 15.88         | 13.72 |
| 20                    | 14.59   | 15.51         | 15.41         | 15.38         | 13.95 |
| 24                    | 14.42   | 15.08         | 15.03         | 15.325        | 13.46 |
| 28                    | 15      | 16.12         | 16.04         | 16.2          | 13.26 |

**Fig4C**

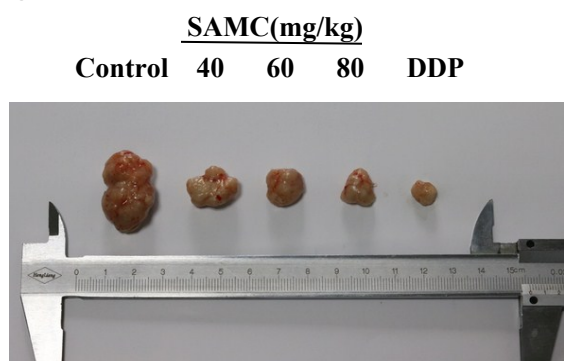

**Fig4D**

| Tumor weight |               |               |               |      |
|--------------|---------------|---------------|---------------|------|
| control      | SAMC 40 mg/kg | SAMC 60 mg/kg | SAMC 80 mg/kg | DDP  |
| 3.18         | 1.78          | 1.45          | 1.14          | 0.88 |
| 3.25         | 1.22          | 1.29          | 1.25          | 0.83 |
| 2.91         | 1.68          | 1.33          | 1.02          | 0.79 |
| 3.08         | 1.69          | 1.49          | 1.21          | 0.72 |
| 3.11         | 1.56          | 1.37          | 1.14          | 0.83 |
| 3.14         | 1.43          | 1.25          | 1.07          | 0.94 |



**Fig5A**

| Concentration of BUN(mmol/L) |               |               |               |       |
|------------------------------|---------------|---------------|---------------|-------|
| control                      | SAMC 40 mg/kg | SAMC 60 mg/kg | SAMC 80 mg/kg | DDP   |
| 12.87                        | 12.34         | 16.91         | 11.99         | 21.93 |
| 13.47                        | 11.92         | 19.34         | 14.83         | 17.05 |
| 14.81                        | 15.21         | 13.7          | 15.78         | 18.18 |
| 13.72                        | 13.16         | 16.65         | 14.2          | 19.06 |
| 13.21                        | 14.49         | 15.84         | 13.68         | 18.95 |
| 14.23                        | 11.83         | 17.46         | 14.72         | 19.17 |

**Fig5B**

| Concentration of Cr( $\mu$ mol/L) |               |               |               |       |
|-----------------------------------|---------------|---------------|---------------|-------|
| control                           | SAMC 40 mg/kg | SAMC 60 mg/kg | SAMC 80 mg/kg | DDP   |
| 17.12                             | 11.81         | 15.94         | 12.6          | 26.11 |
| 14.81                             | 13.61         | 18.71         | 13.83         | 20.61 |
| 11.78                             | 15.42         | 14.47         | 17.31         | 20.11 |
| 14.57                             | 13.61         | 16.37         | 14.58         | 22.28 |
| 13.16                             | 14.21         | 17.21         | 15.29         | 21.23 |
| 15.98                             | 13.01         | 15.54         | 13.87         | 23.32 |

**Fig5C**

| Concentration of ALT(U/L) |               |               |               |        |
|---------------------------|---------------|---------------|---------------|--------|
| control                   | SAMC 40 mg/kg | SAMC 60 mg/kg | SAMC 80 mg/kg | DDP    |
| 104.34                    | 110.15        | 107.46        | 102.02        | 124.93 |
| 109.93                    | 112.84        | 105.41        | 113.87        | 118.38 |
| 103.07                    | 107.84        | 107.46        | 112.17        | 132.03 |
| 105.78                    | 110.28        | 106.78        | 109.35        | 125.11 |
| 106.89                    | 108.75        | 104.92        | 111.24        | 127.41 |
| 104.67                    | 111.8         | 108.63        | 107.47        | 122.82 |

**Fig5D**

| Concentration of AST(U/L) |               |               |               |       |
|---------------------------|---------------|---------------|---------------|-------|
| control                   | SAMC 40 mg/kg | SAMC 60 mg/kg | SAMC 80 mg/kg | DDP   |
| 22.57                     | 19.99         | 23.41         | 19.45         | 23.77 |
| 20.64                     | 25.74         | 19.45         | 24.91         | 28.71 |
| 21.51                     | 17.05         | 16.72         | 16.74         | 27.51 |
| 21.57                     | 20.93         | 19.86         | 20.37         | 26.66 |
| 20.39                     | 18.36         | 21.29         | 18.26         | 25.64 |
| 22.76                     | 23.49         | 18.43         | 22.47         | 27.69 |
